# Supplementary material for: Urinary profiles of luteinizing hormone, estrogen and progestagen during the estrous and gestational periods in giant pandas (Ailuropda melanoleuca)
Source: PubMed Central journal article supplement (PMC5238505; doi:10.1038/srep40749), 2017-01-16

**Title:** Urinary profiles of luteinizing hormone, estrogen and progesterone during the estrous and gestational periods in giant pandas (*Ailuropda melanoleuca*)

**Authors:** Kailai Cai, Shangmian Yie, Zhihe Zhang, Juan Wang, Zhigang Cai, Li Luo, Yuliang Liu, Hairui Wang, He Huang, Chengdong Wang, Xiangming Huang, Jingchao Lan, Rong Hou\*

### **Preparation of recombinant proteins panda LH beta**

The complete coding sequence of the giant panda LH beta (*LHB*, NM\_001304859.1) was derived from the GenBank database. First, 378 bases LHB gene fragment for the expression of the corresponding protein was synthesized, which contained LHB gene sequence from position 61 to position 426 and inserted Nde I restriction site at 5' starting end as well as XhoI restriction site at 3' end. The synthesized fragment was forward constructed to PET28b (Novagen, USA) vector and named LHB recombinant plasmid. The plasmid was identified by sequencing and restriction analysis (Supplemental Figure 2). Next, the LHB recombinant plasmid was transformed into the E.coli BL21 (DE3) strain (Novagen, USA) and used for induction by adding IPTG at an OD600 of 0.2 mM, and further cultured for 5 h at 37 °C using the empty vector transformed BL21 (DE3) as control. Afterward, the LHB recombinant plasmid was separated by sodium dodecyl sulfate-polyacrylamide gel electrophoresis (SDS-PAGE) (Supplemental Figure 3A). The LHB recombinant bacteria were harvested by centrifugation at 4000 g for 10 min, and the pellet was suspended in 20 mM Tris-HCl buffer, pH 8.0. The cell suspension was subjected to sonication with a 3-s burst and 10-s pause for 20 min in a cooling bath. The lysate was clarified by centrifugation at 10,000 g for 15 min at 4 °C, and the supernatant was collected. For purification, the LHB recombinant protein was purified using affinity chromatography by Ni-NTA Agarose (Qiagen). The purified protein was identified

by SDS-PAGE (Supplemental Figure 3B) and the protein concentration was detected by a non-interference protein assay kit (SK3071, Shanghai Sangon Biotech). The results indicate that the recombinant protein bands were successfully induced by IPTG with a single protein band being displayed on the gel after purification.

### **Supplemental figure legends**

Supplement Figure 1 LH and estrogen profiles during estrous. All the pictures are named with giant panda studbook and breeding year.

Supplemental Figure 2. Identification of recombinant plasmids (A) Sequencing of the LHB recombinant plasmid. (B) Restriction mapping analysis of recombinant plasmid

Supplemental Figure 3. Identification of recombinant protein (A) LHB recombinant protein profile by SDS-PAGE (B) LHB recombinant purified protein by using affinity chromatography by Ni-NTA Agarose and identified by SDS-PAGE

Supplemental Figure 4 Antibodies specific detection (A) anti-LH beta subunit polyclonal antibody (LH-N) Western blot detection with LHB recombinant purified protein (B) anti-LH beta subunit polyclonal antibody (LH-C) Western blot detection with LHB recombinant purified protein. (C) Western Blot detection with LHB recombinant purified protein (original picture)

## Supplemental tables

Supplemental Table S1. Unique amino acids sequences in LH beta subunit in various vertebrates

| Animal vertebrate sources                   | Partial amino acid sequences (N-Term) | Partial amino acid sequences (C-Term) |
|---------------------------------------------|---------------------------------------|---------------------------------------|
| <i>Ailuropoda melanoleuca</i> (giant panda) | RPLCRPINATLAAENEAC                    | CGGPRAQPLACDRPPLPGLL                  |
| <i>Homo sapiens</i> (human)                 | RPWCHPINAILAVEKEGC                    | CGGPKDHPLTCDHPQLSGLL                  |
| <i>Mus musculus</i> (mouse)                 | RPLCRPVNATLAAENEFC                    | CGGPRTQPMACDLPHLPGLL                  |
| <i>Bos taurus</i> (cattle)                  | RPLCQPINATLAAEKEAC                    | CGGPRTQPLACDHPPLPDIL                  |
| <i>Equus caballus</i> (horse)               | RPLCRPINATLAAEKEAC                    | CGVFRDQPLACAPQASSSSD                  |
| <i>Ovis aries</i> (sheep)                   | RPLCQPINATLAAEKEAC                    | CGGPRTQPLACDHPPLPDIL                  |

Supplemental Table S2 Detection of antibody titer in serum by indirect ELISA

| Rabbit No. | Antigen  | Blank | Negative |        |         |         | Positive |        |         |         |
|------------|----------|-------|----------|--------|---------|---------|----------|--------|---------|---------|
|            |          |       | 1:500    | 1:5000 | 1:20000 | 1:40000 | 1:500    | 1:5000 | 1:20000 | 1:40000 |
| 1          | LH-N-KLH | 0.127 | 0.28     | 0.141  | 0.14    | 0.131   | 2.13     | 1.99   | 1.695   | 1.443   |
| 2          | LH-N-KLH | 0.131 | 0.349    | 0.168  | 0.136   | 0.135   | 1.859    | 1.697  | 1.169   | 0.578   |
| 3          | LH-N-KLH | 0.129 | 1.317    | 0.252  | 0.15    | 0.151   | 2.054    | 1.824  | 1.535   | 1.218   |
| 4          | LH-C-KLH | 0.138 | 0.401    | 0.164  | 0.185   | 0.118   | 1.667    | 1.62   | 1.496   | 1.327   |
| 5          | LH-C-KLH | 0.174 | 0.387    | 0.152  | 0.159   | 0.123   | 1.604    | 1.598  | 1.473   | 1.339   |
| 6          | LH-C-KLH | 0.192 | 1.076    | 0.315  | 0.16    | 0.172   | 1.622    | 1.77   | 1.415   | 0.999   |

Supplemental Table S3. Coated antibody and labeled antibody pair selection

| Coated antibody | Labeled antibody | Blank1 | Blank2 | Urine1 | Urine2 | Urine3 |
|-----------------|------------------|--------|--------|--------|--------|--------|
| LH-N-1          | LH-C-1           | 0.596  | 0.636  | 1.148  | 0.801  | 0.70   |
| LH-N-1          | LH-C-2           | 0.386  | 0.358  | 1.001  | 0.699  | 0.659  |
| LH-N-1          | LH-C-3           | 0.674  | 0.646  | 1.300  | 0.872  | 0.846  |
| LH-N-2          | LH-C-1           | 0.632  | 0.614  | 0.900  | 1.096  | 0.667  |
| LH-N-2          | LH-C-2           | 0.397  | 0.409  | 1.656  | 1.503  | 1.205  |
| LH-N-2          | LH-C-3           | 0.568  | 0.548  | 1.191  | 1.127  | 0.673  |
| LH-N-3          | LH-C-1           | 0.550  | 0.551  | 0.951  | 1.084  | 0.671  |
| LH-N-3          | LH-C-2           | 0.337  | 0.331  | 1.433  | 1.280  | 1.008  |
| LH-N-3          | LH-C-3           | 0.477  | 0.511  | 1.162  | 1.032  | 0.614  |
| LH-C-1          | LH-N-1           | 0.742  | 0.786  | 1.211  | 1.018  | 0.829  |
| LH-C-1          | LH-N-1           | 0.986  | 1.043  | 1.251  | 1.269  | 1.137  |
| LH-C-1          | LH-N-1           | 0.868  | 0.931  | 1.344  | 1.499  | 0.976  |
| LH-C-2          | LH-N-2           | 0.465  | 0.45   | 1.231  | 0.906  | 0.684  |
| LH-C-2          | LH-N -2          | 0.728  | 0.724  | 1.471  | 1.475  | 1.037  |
| LH-C-2          | LH-N -2          | 0.542  | 0.569  | 1.631  | 1.598  | 1.153  |
| LH-C-3          | LH-N -3          | 0.444  | 0.416  | 1.043  | 0.680  | 0.681  |
| LH-C-3          | LH-N -3          | 0.763  | 0.713  | 1.12   | 0.866  | 0.920  |
| LH-C-3          | LH-N -3          | 0.624  | 0.582  | 1.411  | 0.857  | 0.891  |

Supplemental Table S4. Working concentration of the labeled antibody

| Coated antibody |            | Labeled antibody (LH-N-3) |        |        |        |          |
|-----------------|------------|---------------------------|--------|--------|--------|----------|
| LH-N-3(10ug/mL) | dilution   | 1:1000                    | 1:2000 | 1:3000 | 1:4000 | negative |
|                 | O.D. value | 0.301                     | 0.192  | 0.158  | 0.148  | 0.143    |

# Supplemental Figures

## Supplemental Figure 1

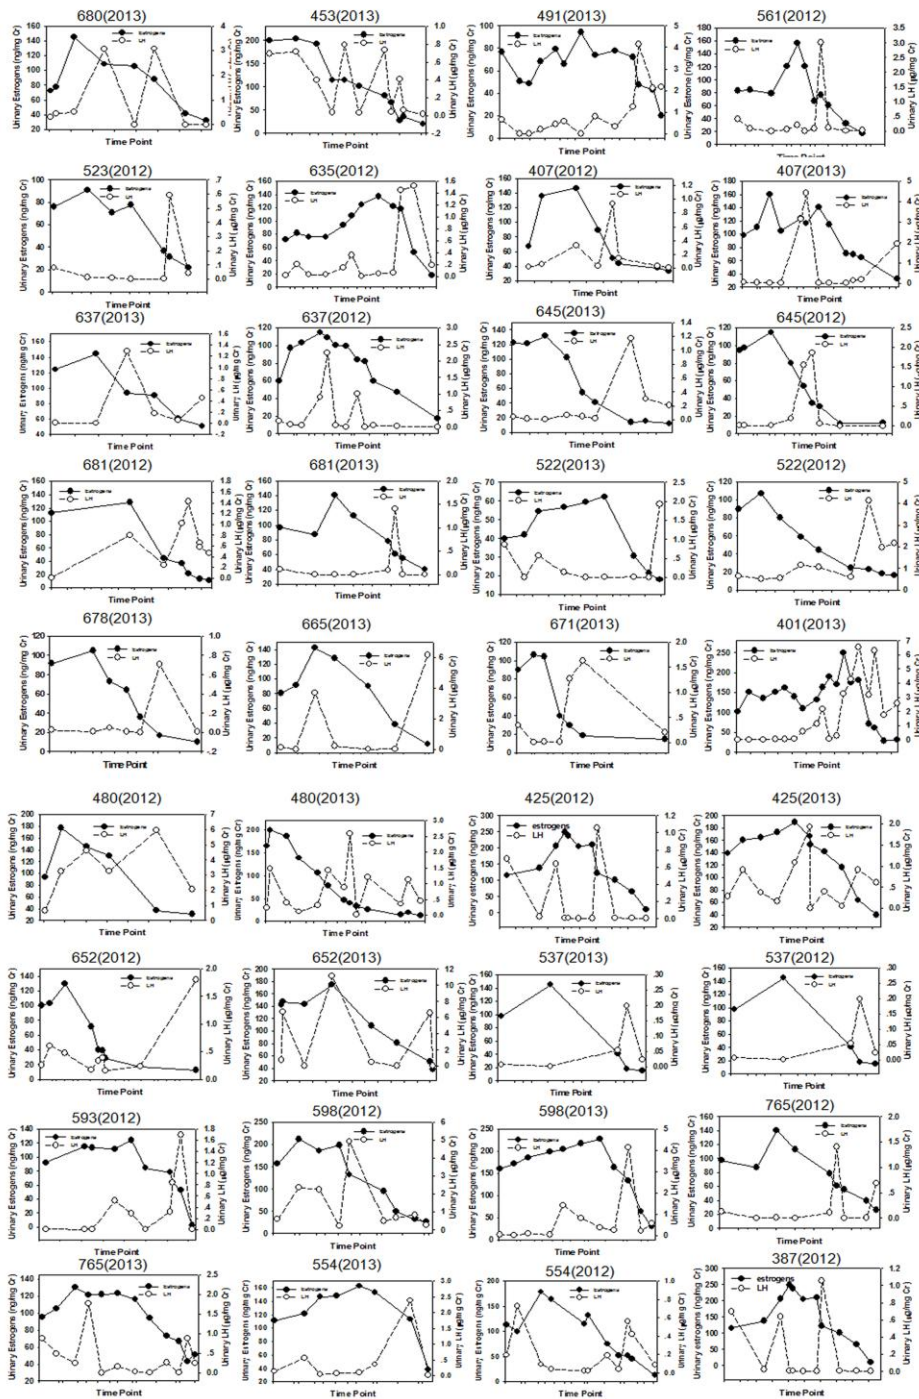

Supplemental Figure2

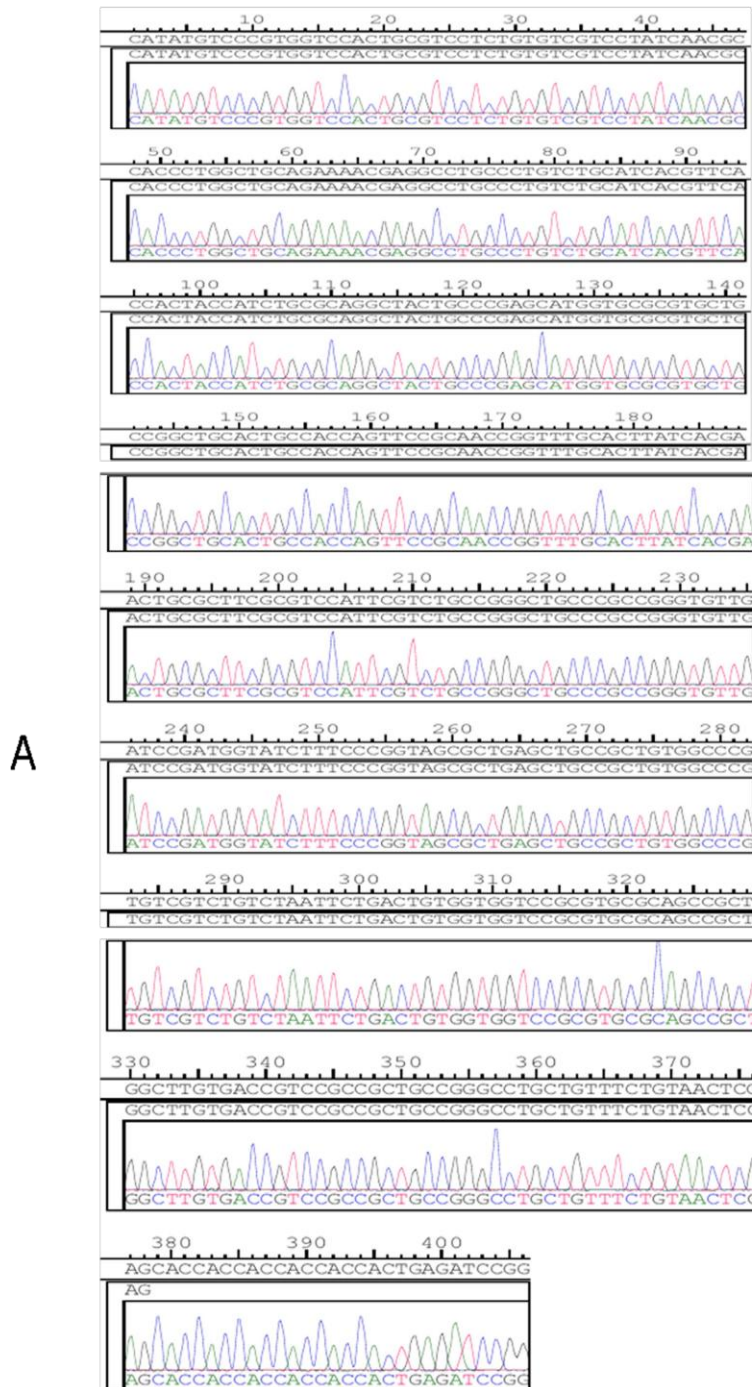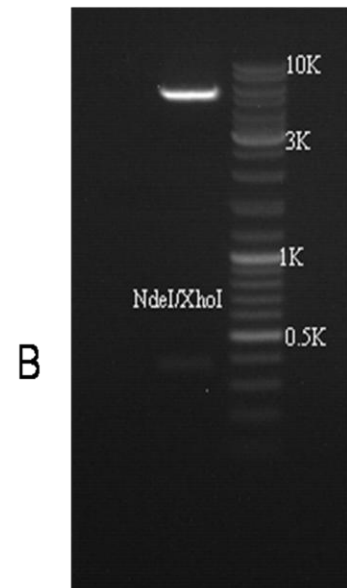



Supplemental Figure3

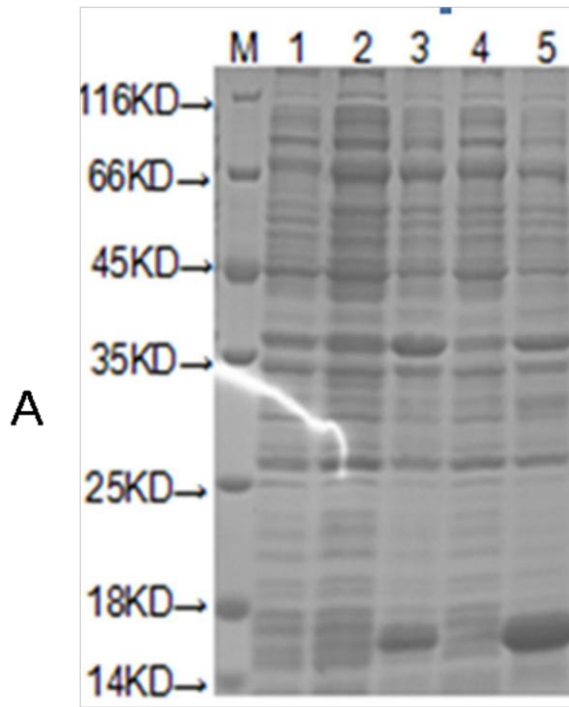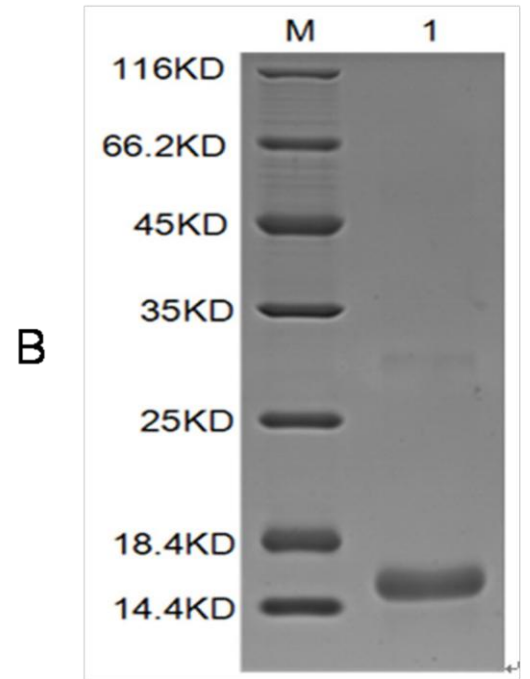

Supplemental Figure 4

A

B

C

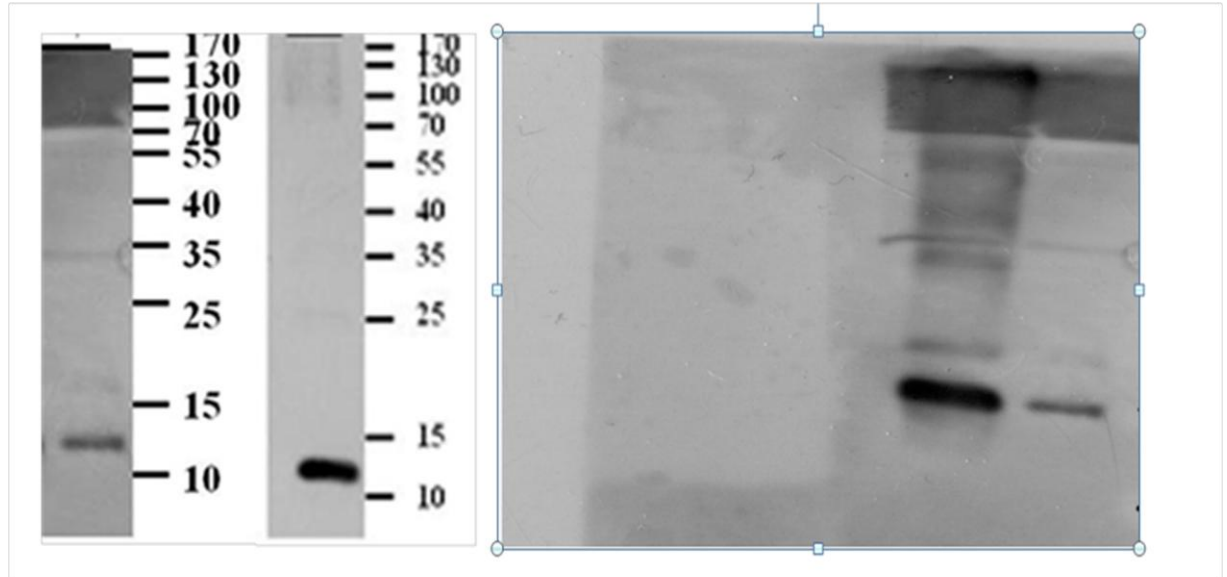

Supplement: srep40749-s1.pdf [file srep40749-s1.pdf]
